# Supplementary material for: Propylene Production via Oxidative Dehydrogenation of Propane with Carbon Dioxide over Composite MxOy-TiO2 Catalysts
Source: MDPI journal article supplement (doi:10.3390/nano14010086), 2023-12-28
Supplement: s1 [file s1]

# SUPPLEMENTARY MATERIAL

## Propylene Production via Oxidative Dehydrogenation of Propane with Carbon Dioxide over Composite $M_xO_y$ - $TiO_2$ Catalysts

Alexandra Florou <sup>1</sup>, Georgios Bamos <sup>2</sup>, Panagiota D. Natsi <sup>2</sup>, Aliko Kokka <sup>1</sup>  
and Paraskevi Panagiotopoulou <sup>1,\*</sup>

<sup>1</sup> Laboratory of Environmental Catalysis, School of Chemical and Environmental Engineering, Technical University of Crete, GR-73100 Chania, Greece; aflorou@tuc.gr (A.F.); akokka@tuc.gr (A.K.)

<sup>2</sup> Department of Chemical Engineering, University of Patras, GR-26504 Patras, Greece; geoba@chemeng.upatras.gr (G.B.); natsi@chemeng.upatras.gr (P.D.N.)

\* Correspondence: ppanagiotopoulou@tuc.gr; Tel.: +30-28210-37770

**Table S1.** Comparison of literature results for the reaction of the CO<sub>2</sub>-assisted ODP.

| Catalyst                                                       | CO <sub>2</sub> -assisted ODP<br>reaction conditions<br>(WGHSV; CO <sub>2</sub> :C <sub>3</sub> H <sub>8</sub><br>ratio) | T<br>(°C) | X <sub>C<sub>3</sub>H<sub>8</sub></sub><br>(%) | S <sub>C<sub>3</sub>H<sub>6</sub></sub><br>(%) | Y <sub>C<sub>3</sub>H<sub>6</sub></sub><br>(%) | Ref.      |
|----------------------------------------------------------------|--------------------------------------------------------------------------------------------------------------------------|-----------|------------------------------------------------|------------------------------------------------|------------------------------------------------|-----------|
| Ga <sub>2</sub> O <sub>3</sub> -TiO <sub>2</sub>               | WGHSV= 6000 mL h <sup>-1</sup> g <sup>-1</sup><br>CO <sub>2</sub> :C <sub>3</sub> H <sub>8</sub> =5:1                    | 700       | 45                                             | 36.2                                           | 16.3                                           | This work |
| Gr <sub>2</sub> O <sub>3</sub> -TiO <sub>2</sub>               |                                                                                                                          |           | 45.6                                           | 35                                             | 16.0                                           |           |
| Ga <sub>2</sub> O <sub>3</sub> -TiO <sub>2</sub>               | WGHSV= 6000 mL h <sup>-1</sup> g <sup>-1</sup><br>CO <sub>2</sub> :C <sub>3</sub> H <sub>8</sub> =2:1                    | 600       | 32                                             | 73                                             | 23.4                                           | [15]      |
| Ga <sub>2</sub> O <sub>3</sub> -Al <sub>2</sub> O <sub>3</sub> |                                                                                                                          |           | 26                                             | 94                                             | 24.4                                           |           |
| Ga <sub>2</sub> O <sub>3</sub> -ZrO <sub>2</sub>               |                                                                                                                          |           | 30                                             | 65                                             | 19.5                                           |           |
| Ga <sub>2</sub> O <sub>3</sub> -SiO <sub>2</sub>               |                                                                                                                          |           | 6.4                                            | 92                                             | 5.9                                            |           |
| Ga <sub>2</sub> O <sub>3</sub> -MgO                            |                                                                                                                          |           | 4.3                                            | 29                                             | 1.2                                            |           |
| Ga <sub>2</sub> O <sub>3</sub> -Al <sub>2</sub> O <sub>3</sub> | WGHSV= 6000 mL h <sup>-1</sup> g <sup>-1</sup><br>CO <sub>2</sub> :C <sub>3</sub> H <sub>8</sub> =3:1                    | 550       | 35.2                                           | 95                                             | 33.4                                           | [71]      |
| Ga <sub>2</sub> O <sub>3</sub> -Al <sub>2</sub> O <sub>3</sub> | WGHSV= 4500 mL h <sup>-1</sup> g <sup>-1</sup><br>CO <sub>2</sub> :C <sub>3</sub> H <sub>8</sub> =5:1                    | 600       | 36                                             | 82.1                                           | 29.6                                           | [29]      |
| Ga <sub>2</sub> O <sub>3</sub> -Al <sub>2</sub> O <sub>3</sub> | WGHSV= 3000 mL h <sup>-1</sup> g <sup>-1</sup><br>CO <sub>2</sub> :C <sub>3</sub> H <sub>8</sub> =2:1                    | 500       | 49.7                                           | 91.7                                           | 45.6                                           | [75]      |

|                                                                |                                                                                                       |     |      |      |      |       |
|----------------------------------------------------------------|-------------------------------------------------------------------------------------------------------|-----|------|------|------|-------|
| CrO <sub>x</sub> /CNTs <sup>a</sup>                            | WGHSV= 3600 mL h <sup>-1</sup> g <sup>-1</sup><br>CO <sub>2</sub> :C <sub>3</sub> H <sub>8</sub> =2:1 | 600 | 13   | 61.5 | 8.0  | [73]  |
| CrO <sub>x</sub> /GNFs <sup>b</sup>                            |                                                                                                       |     | 21   | 56.2 | 11.8 |       |
| CrO <sub>x</sub> /silicalite-1                                 | WGHSV= 3000 mL h <sup>-1</sup> g <sup>-1</sup><br>CO <sub>2</sub> :C <sub>3</sub> H <sub>8</sub> =5:1 | 550 | 50   | 67   | 33.5 | [74]  |
| Ga <sub>2</sub> O <sub>3</sub> -m <sup>c</sup>                 | WGHSV= 9000 mL h <sup>-1</sup> g <sup>-1</sup><br>CO <sub>2</sub> :C <sub>3</sub> H <sub>8</sub> =5:1 | 550 | 19.0 | 91.6 | 17.4 | [5]   |
| Ga <sub>2</sub> O <sub>3</sub> -Al <sub>2</sub> O <sub>3</sub> |                                                                                                       |     | 13.2 | 95.8 | 12.6 |       |
| Ga/Na-ZSM5                                                     | WGHSV= 7200 mL h <sup>-1</sup> g <sup>-1</sup><br>CO <sub>2</sub> :C <sub>3</sub> H <sub>8</sub> =1:1 | 600 | 59   | 44   | 26.0 | [27]  |
| Ga/Na-SSZ-39                                                   |                                                                                                       |     | 38   | 63   | 23.9 |       |
| 5%CrO <sub>x</sub> /MCM-41                                     | WGHSV= 1800 mL h <sup>-1</sup> g <sup>-1</sup><br>CO <sub>2</sub> :C <sub>3</sub> H <sub>8</sub> =2:1 | 650 | 21   | 81   | 17.0 | [8]   |
| 5%Cr/Ce <sub>0.1</sub> Zr <sub>0.9</sub> O <sub>2</sub>        | WGHSV= 6000 mL h <sup>-1</sup> g <sup>-1</sup><br>CO <sub>2</sub> :C <sub>3</sub> H <sub>8</sub> =2:1 | 600 | 75   | 66.7 | 50.1 | [105] |
| 5%Cr/ZrO <sub>2</sub>                                          |                                                                                                       |     | 79.8 | 57.6 | 45.9 |       |
| 5%Cr/CeO <sub>2</sub>                                          |                                                                                                       |     | 20.8 | 79.8 | 16.6 |       |

<sup>a</sup>: CNTs: Carbon nanotubes

<sup>b</sup>: GNFs: Carbon nanoflakes

<sup>c</sup>: m: mesoporous

## Thermogravimetric analysis (TGA)

The surface acidity was defined as the micromoles of acid sites per gram of catalyst and calculated by the weight loss obtained from the TGA curves using the following equation (S1) [88].

$$Acidity = \left( \frac{\%Weight\ loss}{100} \right) \cdot \left( \frac{1}{MW_{NH_3}} \right) \cdot 10^6 \quad \left[ \frac{\mu mol}{g} \right] \quad (S1)$$

Where  $MW_{NH_3}$  is the molecular weight of ammonia (=17.031 g/mol) and %*Weight loss* is the weight loss obtained from the TGA curve in each weight loss region as indicated with the double arrows in Figure S3. Therefore, we estimated the density of weak/moderate and strong acid sites for the investigated catalysts and results obtained are shown in Table S2.

**Table S2:** Acid site density estimated from TGA experiments over TiO<sub>2</sub>, 10%Cr<sub>2</sub>O<sub>3</sub>-TiO<sub>2</sub> and 10%Ga<sub>2</sub>O<sub>3</sub>-TiO<sub>2</sub>

| Catalyst                                            | Acid Site Density (μmol/g) |        |       |
|-----------------------------------------------------|----------------------------|--------|-------|
|                                                     | Weak/Moderate              | Strong | Total |
| TiO <sub>2</sub>                                    | 139.2                      | 170.9  | 310.1 |
| 10%Cr <sub>2</sub> O <sub>3</sub> -TiO <sub>2</sub> | 169.1                      | 149.7  | 318.8 |
| 10%Ga <sub>2</sub> O <sub>3</sub> -TiO <sub>2</sub> | 267.2                      | 243.1  | 510.3 |

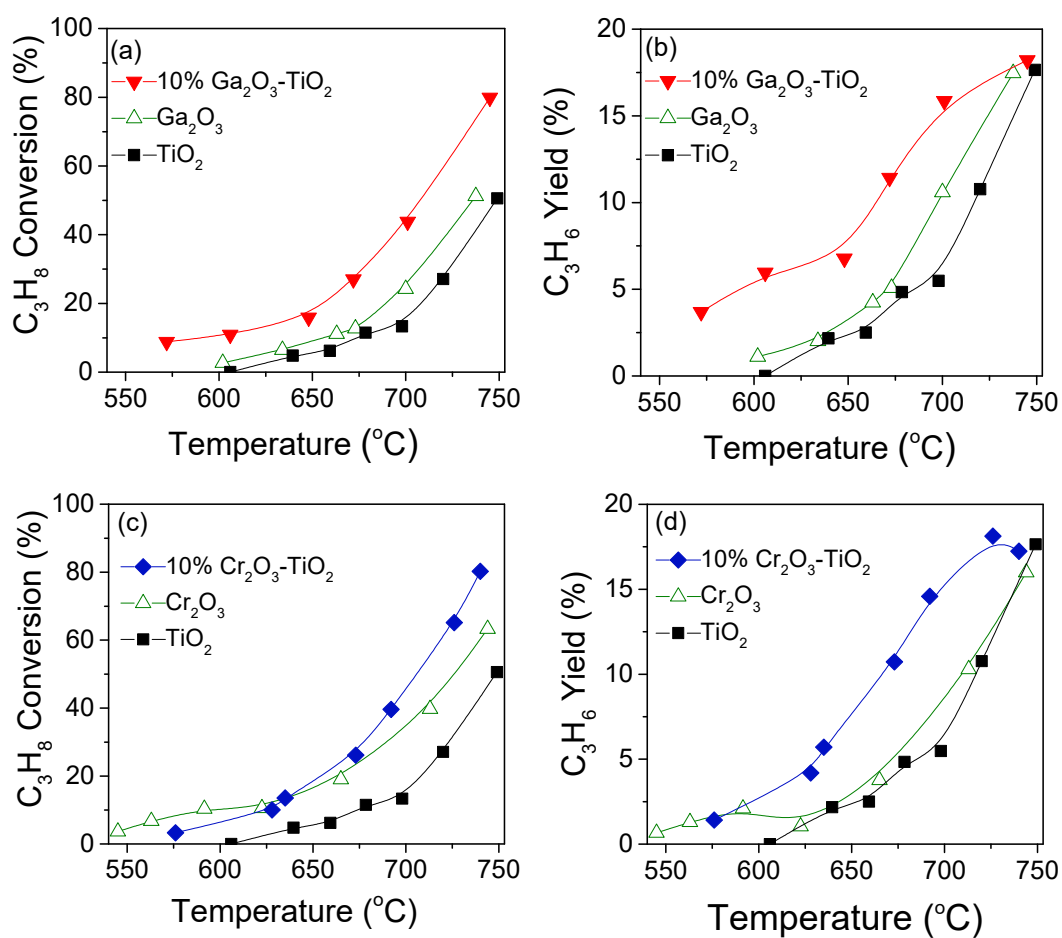

**Figure S1.** (a, c) Conversions of  $C_3H_8$  and (b, d) yields of  $C_3H_6$  as a function of reaction temperature obtained over  $TiO_2$ ,  $Ga_2O_3$ ,  $Cr_2O_3$  and 10% $M_xO_y$ - $TiO_2$  (M: Ga, Cr) catalysts. Experimental conditions same as in Figure 4.

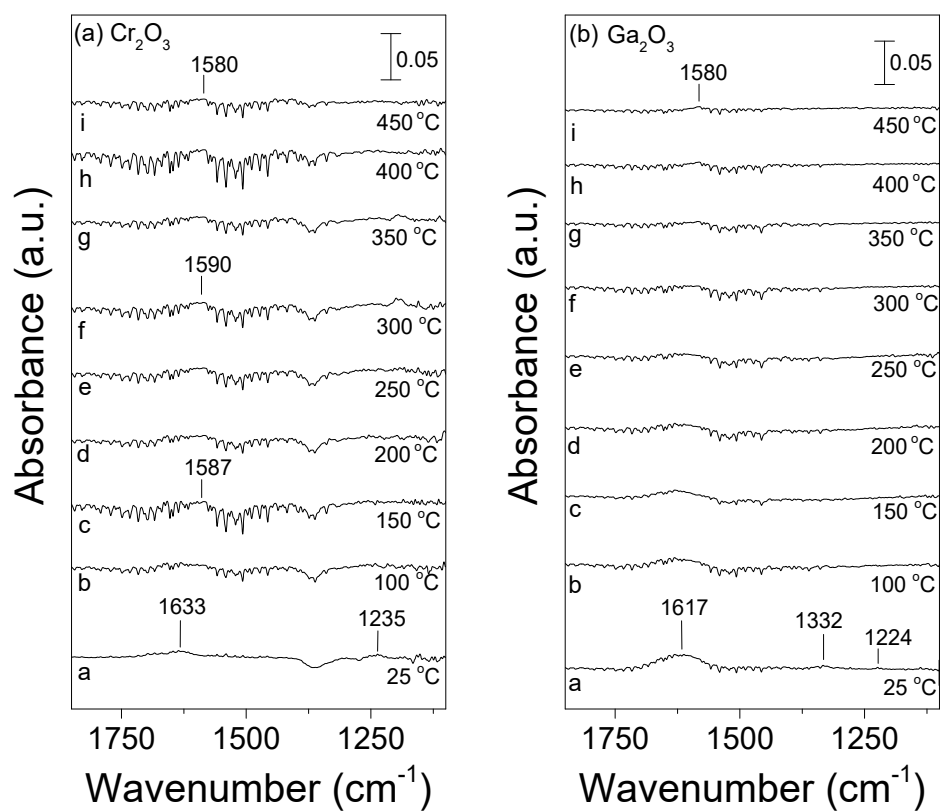

**Figure S2.** DRIFT spectra obtained from (a)  $\text{Cr}_2\text{O}_3$  and (b)  $\text{Ga}_2\text{O}_3$  catalysts following adsorption of  $\text{CO}_2$  at 25 °C for 30 min and subsequent stepwise heating at the indicated temperatures under He flow.

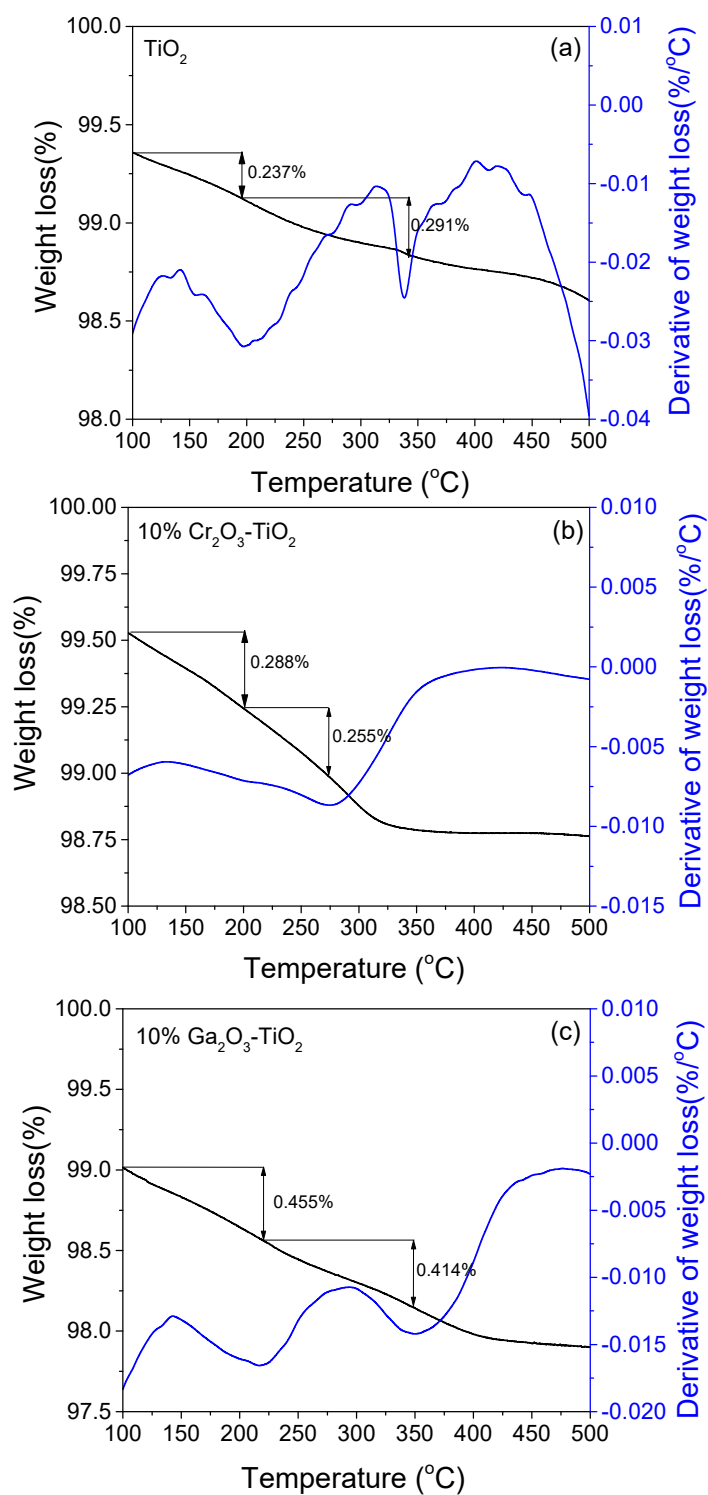

**Figure S3.** TGA derivative curves as a function of temperature obtained from (a)  $\text{TiO}_2$ , (b) 10% $\text{Cr}_2\text{O}_3$ - $\text{TiO}_2$  and (c) 10%  $\text{Ga}_2\text{O}_3$ - $\text{TiO}_2$  catalysts.

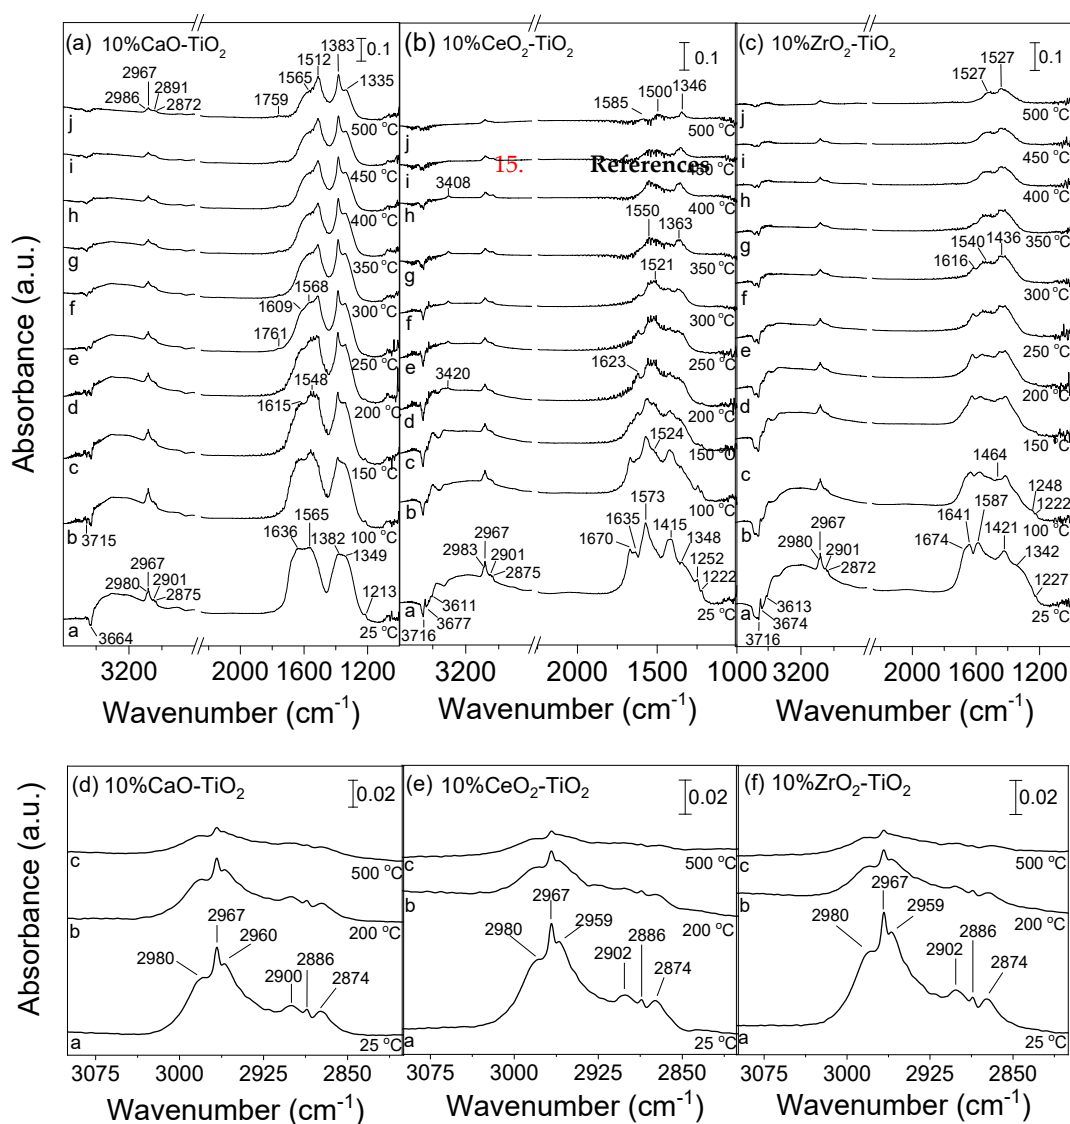

**Figure S4.** DRIFT spectra obtained over (a) CaO-TiO<sub>2</sub>, (b) CeO<sub>2</sub>-TiO<sub>2</sub> and (c) ZrO<sub>2</sub>-TiO<sub>2</sub> catalysts following interaction with 1% C<sub>3</sub>H<sub>8</sub>+5% CO<sub>2</sub> (in He) at 25 °C for 15 min and subsequent stepwise heating at 500 °C. The corresponding DRIFT spectra obtained in the 3100–2750 cm<sup>-1</sup> region are presented in (d), (e) and (f).
